# Supplementary material
Source: PubMed Central journal article supplement (PMC3301993)
Supplement: supp_jn.111.155275_nut155275-SF1.pdf [file supp_jn.111.155275_nut155275-SF1.pdf]

## Online Supporting Material

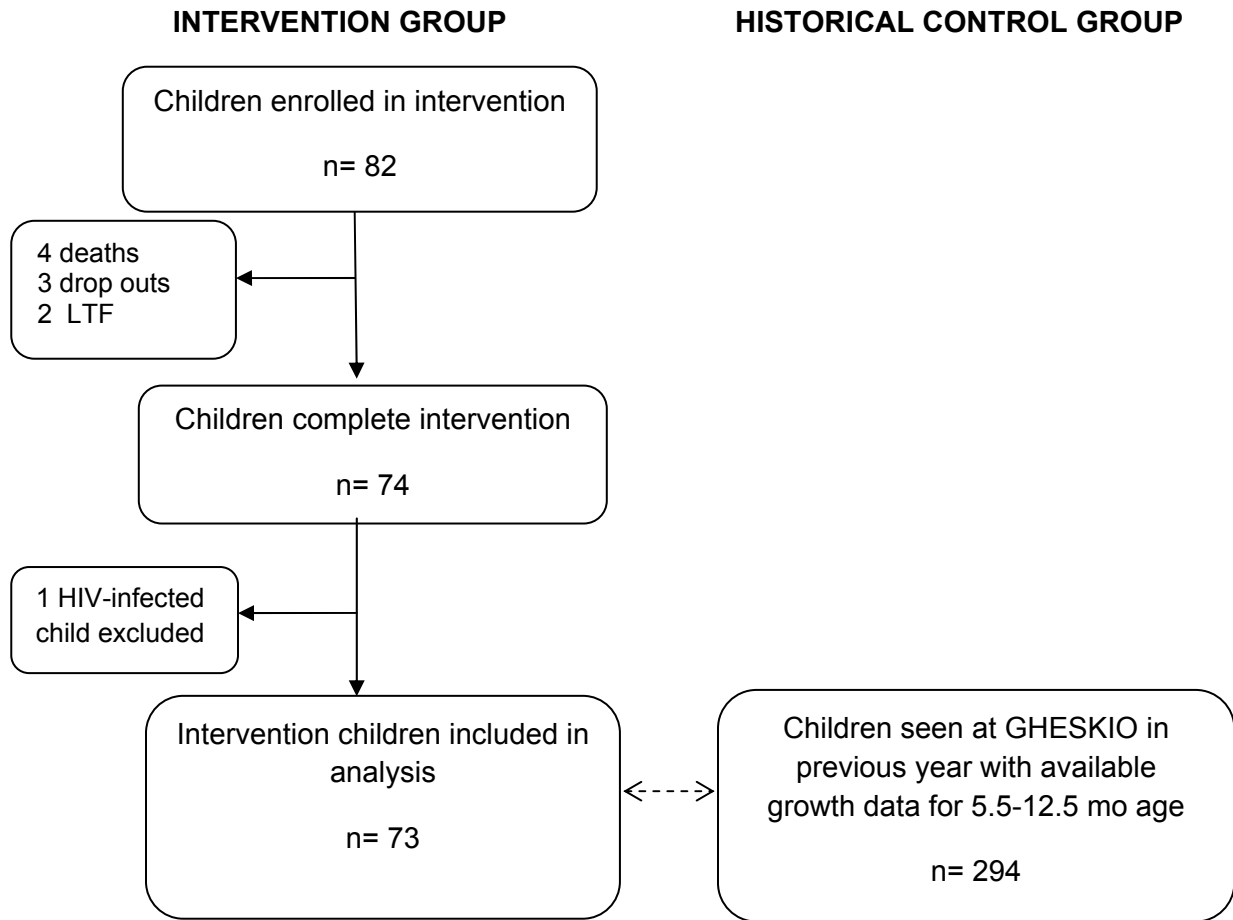

**SUPPLEMENTAL FIGURE 1** Flow chart detailing the inclusion of intervention and historical control children in analysis. Lost-to-follow up (LTF).
